# Supplementary material
Source: PubMed Central journal article supplement (PMC3650331)
Supplement: supp_M112.022145_mcp.M112.022145-1.pdf [file supp_M112.022145_mcp.M112.022145-1.pdf]

**Supplementary Table 1** Identified proteins in BN-SDS gels of WT and LepB1 mutant. Spots 1, 2, 4-16 from Fig. 2; Spots 3a and 3b from Fig. 3.

| Spot new   | ORF                 | MW, kDa | protein                     | Mowse score | No of unique peptides |
|------------|---------------------|---------|-----------------------------|-------------|-----------------------|
| <b>1</b>   | Slr1834             | 83.1    | PSI, PsaA                   | 2997        | 18                    |
|            | Slr1835             | 81.3    | PSI, PsaB                   | 2218        | 19                    |
| <b>2</b>   | Slr0737             | 15.7    | PSI, PsaD                   | 5548        | 23                    |
| <b>3a</b>  | SII0819             | 15.8    | PSI, PsaF                   | 7948        | 39                    |
| <b>3b</b>  | SII0819             | 15.8    | PSI, PsaF                   | 3977        | 29                    |
| <b>4</b>   | Slr1655             | 16.6    | PSI, PsaL                   | 3061        | 7                     |
| <b>5</b>   | Ssr2831             | 8.1     | PSI, PsaE                   | 1584        | 6                     |
| <b>6a</b>  | Slr1329             | 51.8    | ATP synthase F1 $\beta$     | 14065       | 50                    |
| <b>6a</b>  | SII1326             | 54.0    | ATP synthase F1 $\alpha$    | 7826        | 43                    |
| <b>6b</b>  | SII1327             | 34.6    | ATP synthase F1 $\gamma$    | 5696        | 19                    |
| <b>6d</b>  | SII1325             | 20.1    | ATP synthase F1 $\delta$    | 3424        | 19                    |
| <b>6d</b>  | SII1324             | 20.0    | ATP synthase Fo b           | 1635        | 21                    |
| <b>6c</b>  | SII1322             | 27.4    | ATP synthase Fo a           | 657         | 4                     |
| <b>6e</b>  | Slr1330             | 14.6    | ATP synthase F1 $\epsilon$  | 237         | 4                     |
| <b>7a</b>  | Slr0261             | 44.6    | NADH dehydr H               | 3109        | 41                    |
| <b>7c</b>  | Slr1280             | 27.6    | NADH dehydr B               | 1936        | 29                    |
| <b>7d</b>  | SII0520             | 22.6    | NADH dehydr I               | 1124        | 25                    |
| <b>7b</b>  | SII0519             | 40.6    | NADH dehydr H               | 314         | 4                     |
| <b>7e</b>  | Slr1281             | 20.8    | NADH dehydr J               | 209         | 6                     |
| <b>8</b>   | Slr0906             | 55.9    | PSII CP47                   | 6330        | 32                    |
| <b>9</b>   | SII0851             | 50.4    | PSII CP43                   | 3121        | 33                    |
|            | Slr0906             | 55.9    | PSII CP47                   | 2527        | 27                    |
| <b>10</b>  | SII0851             | 50.4    | PSII CP43                   | 4036        | 30                    |
| <b>11</b>  | SII0849/<br>Slr0927 | 39.6    | PSII D2                     | 2062        | 9                     |
| <b>12</b>  | Slr1311/<br>SII1867 | 39.9    | PSII D1                     | 1260        | 6                     |
| <b>13</b>  | Ssr3451             | 9.4     | PSII cytb559 $\alpha$       | 2480        | 4                     |
| <b>14a</b> | SII1317             | 30.5    | Cytb6-f compl<br>cytf       | 3339        | 20                    |
| <b>14b</b> | Slr1317             | 30.5    | Cytb6-f compl<br>cytf       | 2303        | 20                    |
| <b>15</b>  | Slr0342             | 25.1    | Cytb6-f compl cyt<br>b6     | 604         | 6                     |
| <b>16</b>  | Slr0343             |         | Cytb6-f compl<br>subunit IV | 1221        | 8                     |

Spots 6a-6e were analysed in one MS/MS experiment; Spots 7a-7e were analysed in one MS/MS experiment.
