# Supplementary material
Source: PubMed Central journal article supplement (PMC3650331)
Supplement: supp_M112.022145_mcp.M112.022145-3.pdf [file supp_M112.022145_mcp.M112.022145-3.pdf]

Spectra of total membranes from WT and LepB1 mutant

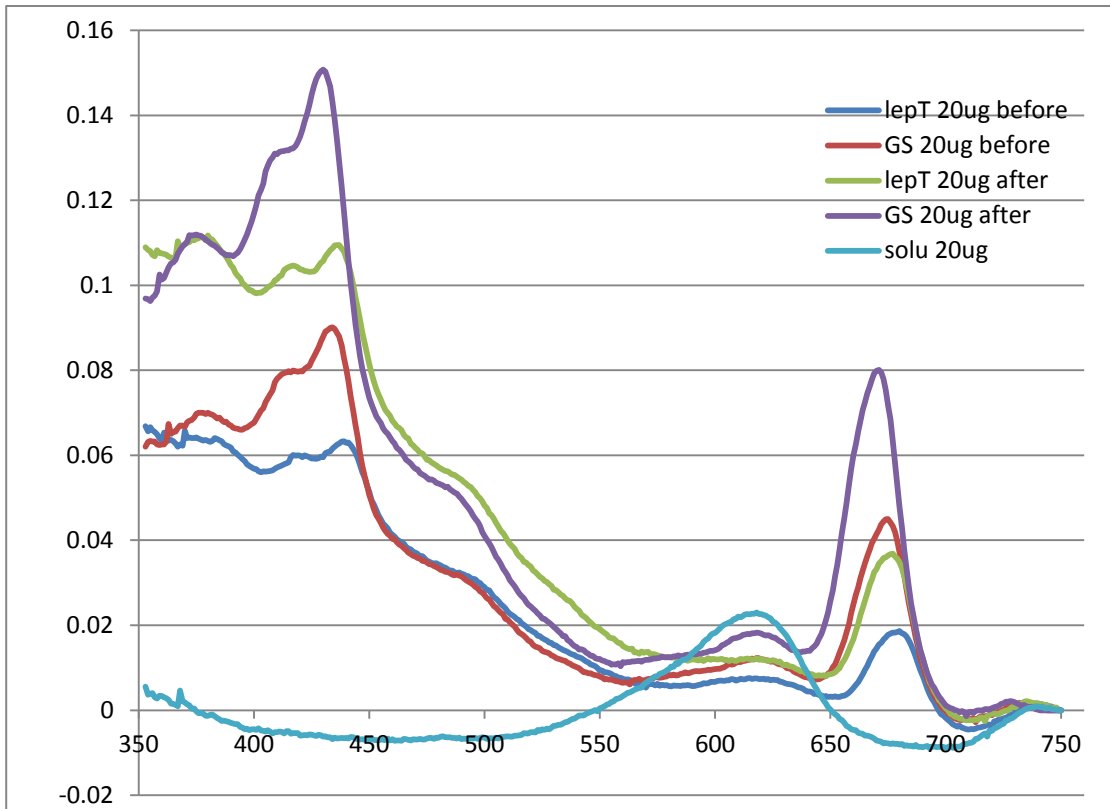

|                | washed membrane     | unwashed membrane |
|----------------|---------------------|-------------------|
| ratio LepB1/WT | 67%                 | 61.80%            |
|                | phycocyanin (618nm) |                   |
|                | chlorophyll(680nm)  |                   |
| ratio LepB1/WT | 46%                 | 41.50%            |
